# Supplementary material for: Multiple-Pathway Analysis of Double-Strand Break Repair Mutations in Drosophila
Source: PLOS journal article supplement (doi:10.1371/journal.pgen.0030050), 2007-04-10
Supplement: S1 (10.1371/journal.pgen.0030050.s001) [file journal.pgen.0030050.s001]

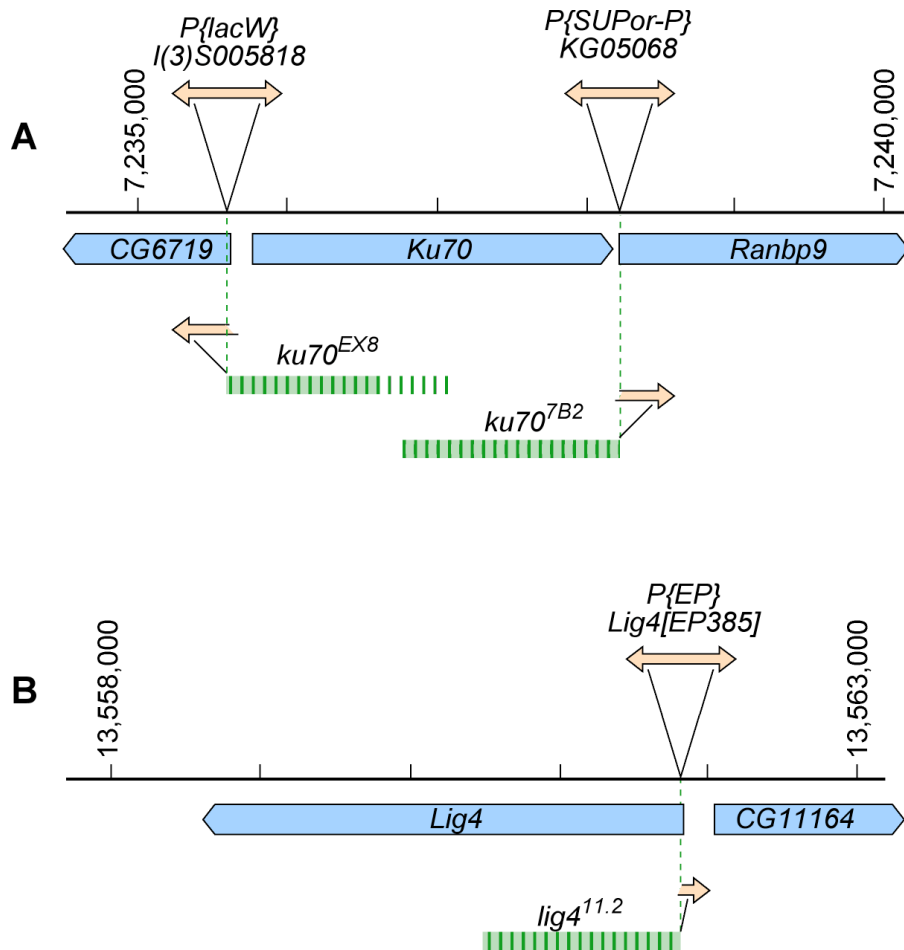

**Figure S1. Deletion mutations at *ku70* and *lig4* loci.** Deletions at both loci were obtained by mobilization of a nearby P element insertion and selection for loss of the *white*<sup>+</sup> marker carried within the element. Maps and coordinates are from FlyBase [82] release 5.1. **(A)** Map of the vicinity of *Ku70* showing the two insertions used to generate deletions. The position of the *P{lacW}* element was refined with TAIL PCR (Liu, YG and RF Whittier, 1995. Genomics 25: 674) to obtain flanking sequence information indicating its location at 7235543. The deletions, shown as green barred lines, each had one breakpoint within the P element and the other within the *Ku70* gene. The endpoints of *ku70*<sup>EX8</sup> were estimated from amplicon sizes, with the unshaded portion representing the area of uncertainty. Approximately 1kb of the *P{lacW}* element remains. The limits of *ku70*<sup>7B2</sup> were obtained by sequencing across the breakpoint to obtain: GCAGCTATCG AACTGGACGC CTTCCAGG TGgtaatcc cctt**CCATT GGTTAATCAG CAGACCTCG TTGGCGTAAC GGAA**. Bases within *Ku70* are italicized, those derived from the *white*<sup>+</sup> region of the P element are in boldface, and bases of unknown origin are shown as lower case. **(B)** Map of the vicinity of *lig4* showing the P insertion used to generate deletion *lig4*<sup>11.2</sup>. The sequence at the deletion breakpoint is: TTTCTGCAAT TTGTACGCC CGCTGAATGT ATGTTATTT **CATCATGAT CACTGTGAA CATCTGTTC AAGCAATGT GACC**, where bases within *Lig4* or to the right of the insertion are italicized and the P element bases are in boldface.
